# Supplementary material for: Hydrodeoxygenation of lignin-derived phenols into alkanes over carbon nanotube supported Ru catalysts in biphasic systems
Source: Royal Society of Chemistry journal article supplement (doi:10.1039/c4gc01992j), 2014-12-24
Supplement: c4gc01992j1.pdf [file c4gc01992j1.pdf]

# **Hydrodeoxygenation of Lignin-Derived Phenols into Alkanes over Carbon Nanotubes Supported Ru Catalysts in Biphasic Systems**

*Anhui Province Key Laboratory of Biomass Clean Energy,  
Department of Chemistry, University of Science and Technology of China,  
Hefei 230026, China. Fax: (+86)-551-63606689*

**Corresponding author: Yao Fu**

E-mail: [fuyao@ustc.edu.cn](mailto:fuyao@ustc.edu.cn)

**Table S1.** Chemisorption of supported-Ru catalysts

| Catalysts             | Metal Dispersion/ % | Metallic Surface Area/ m <sup>2</sup> /g metal |
|-----------------------|---------------------|------------------------------------------------|
| 5%Ru/CNT              | 27.2102             | 99.5614                                        |
| 5%Ru/C                | 77.6735             | 284.2050                                       |
| 5%Ru/ZrO <sub>2</sub> | 34.6094             | 126.6350                                       |
| 5%Ru/CeO <sub>2</sub> | 0.3265              | 1.1948                                         |

**Table S2.** N<sub>2</sub> adsorption and desorption of supported-Ru catalysts

| Catalysts             | Surface Area/ m <sup>2</sup> /g <sup>a</sup> | Pore Volume/ m <sup>3</sup> /g <sup>b</sup> | Pore Size/ Å <sup>c</sup> |
|-----------------------|----------------------------------------------|---------------------------------------------|---------------------------|
| 5%Ru/CNT              | 201.6027                                     | 0.725084                                    | 138.560                   |
| 5%Ru/C                | 1245.1460                                    | 1.222686                                    | 42.568                    |
| 5%Ru/ZrO <sub>2</sub> | 98.8010                                      | 0.270289                                    | 91.374                    |
| 5%Ru/CeO <sub>2</sub> | 5.2126                                       | 0.026519                                    | 179.750                   |

a. BET Surface Area; b. BJH Desorption cumulative volume of pores between 17.000 Å and 3000.000 Å diameter; c. BJH Desorption average pore diameter (4V/A)

**Table S3.** XPS Ru 3p analysis for supported-Ru catalysts and used Ru/CNT

| Catalysts           | Ru <sup>0</sup> Area<br>(462.2 ± 0.2 eV) | Ru(IV) Area<br>(464.2 ± 0.3 eV) | Ru(IV) (Hydrate) Area<br>(466.5 ± 0.5 eV) | Ru <sup>0</sup> /(Ru(IV)+Ru(IV) Hydrate) |
|---------------------|------------------------------------------|---------------------------------|-------------------------------------------|------------------------------------------|
| Ru/CNT              | 1937                                     | 1057                            | 863                                       | 1.01                                     |
| Ru/C                | 2343                                     | 1168                            | 875                                       | 1.15                                     |
| Ru/ZrO <sub>2</sub> | 3842                                     | 1229                            | 927                                       | 1.78                                     |
| Ru/CeO <sub>2</sub> | 3097                                     | 1169                            | 851                                       | 1.53                                     |
| Ru/CNT(used)        | 1564                                     | 523                             | 395                                       | 1.70                                     |

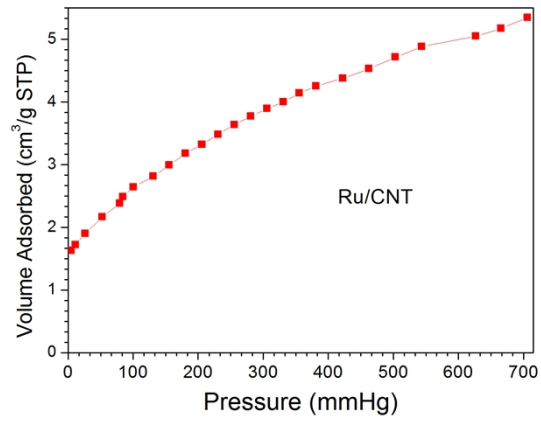

**Figure S1.** Chemisorption of Ru/CNT

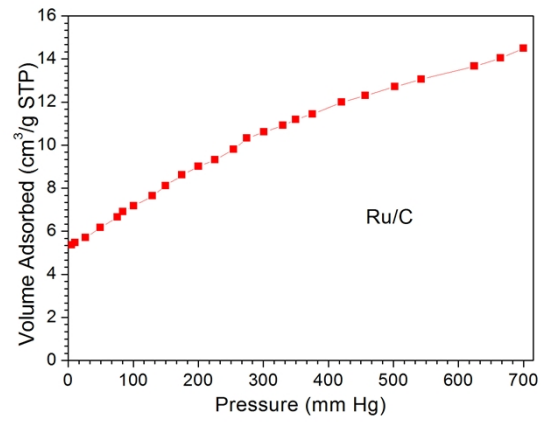

**Figure S2.** Chemisorption of Ru/C

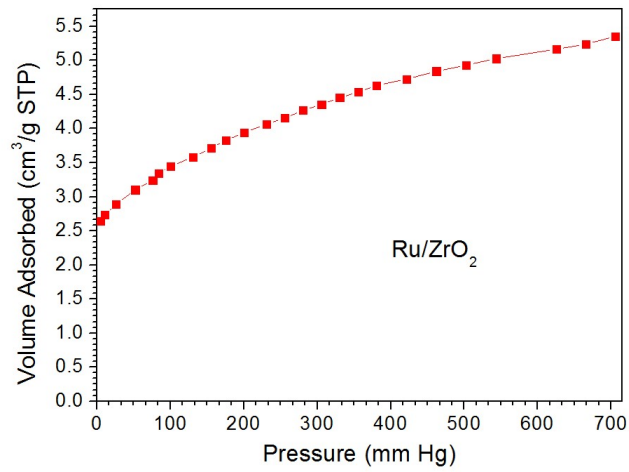

**Figure S3.** Chemisorption of Ru/ZrO<sub>2</sub>

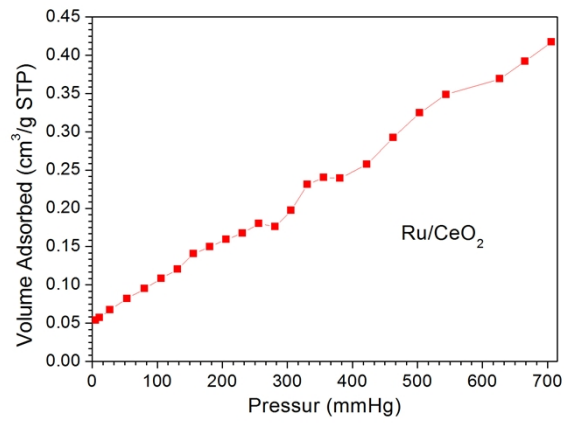

Figure S4. Chemisorption of Ru/CeO<sub>2</sub>

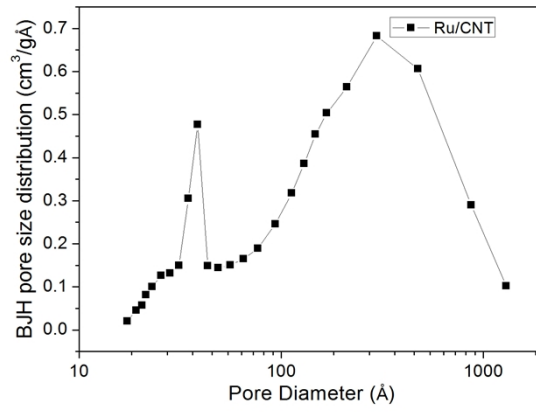

Figure S5. BJH pore size distributions for Ru/CNT

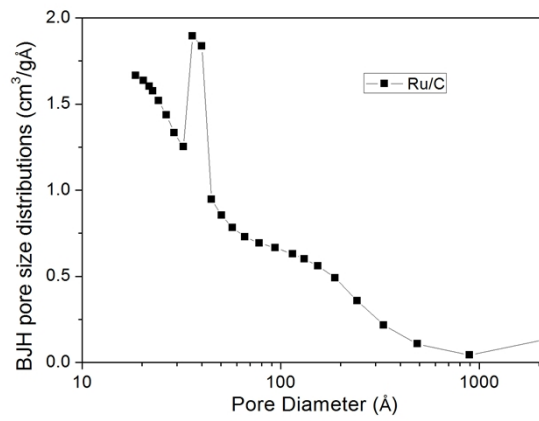

Figure S6. BJH pore size distributions for Ru/C

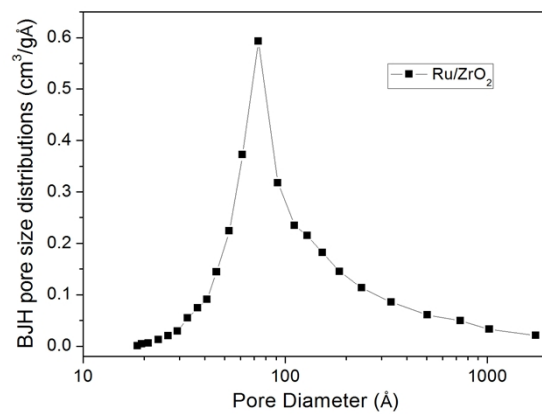

Figure S7. BJH pore size distributions for Ru/ZrO<sub>2</sub>

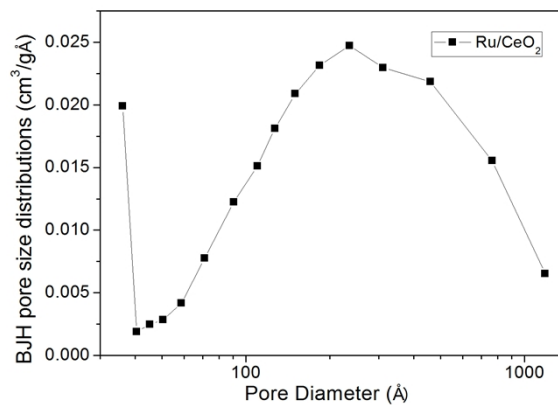

Figure S8. BJH pore size distributions for Ru/CeO<sub>2</sub>

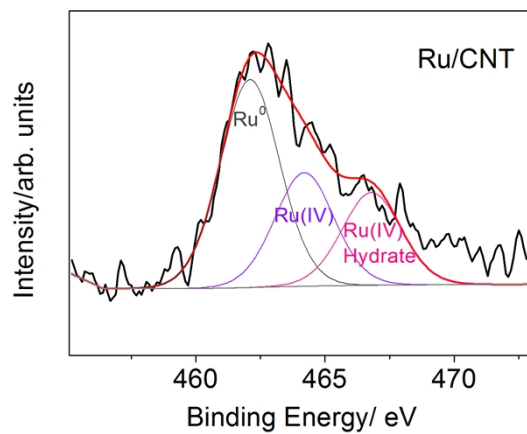

Figure S9. XPS Ru 3p spectra for Ru/CNT

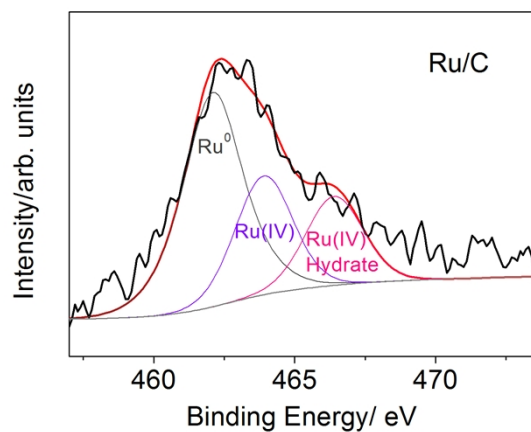

Figure S10. XPS Ru 3p spectra for Ru/C

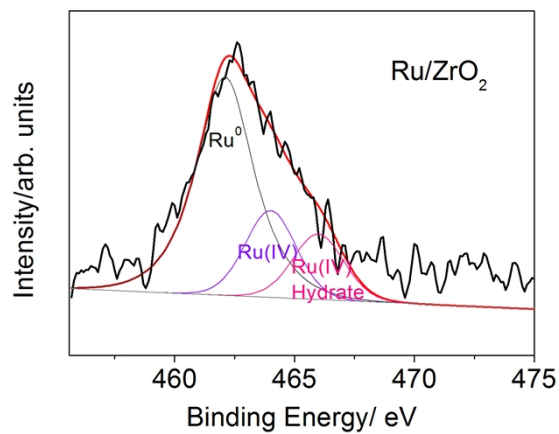

Figure S11. XPS Ru 3p spectra for Ru/ZrO<sub>2</sub>

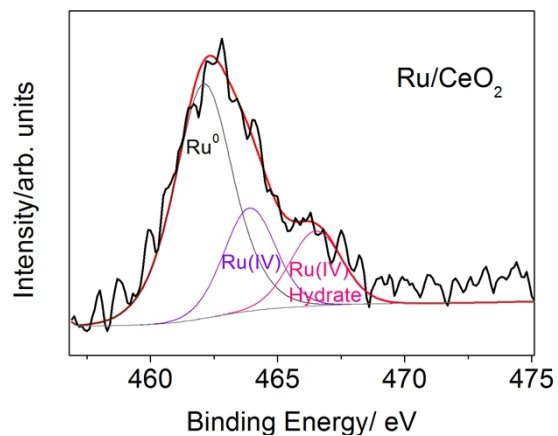

Figure S12. XPS Ru 3p spectra for Ru/CeO<sub>2</sub>

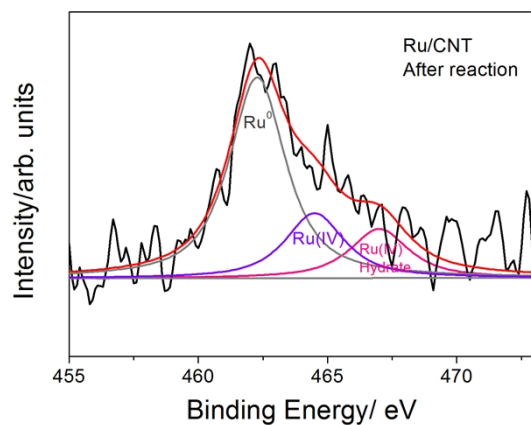

Figure S13. XPS Ru 3p spectra for the used Ru/CNT

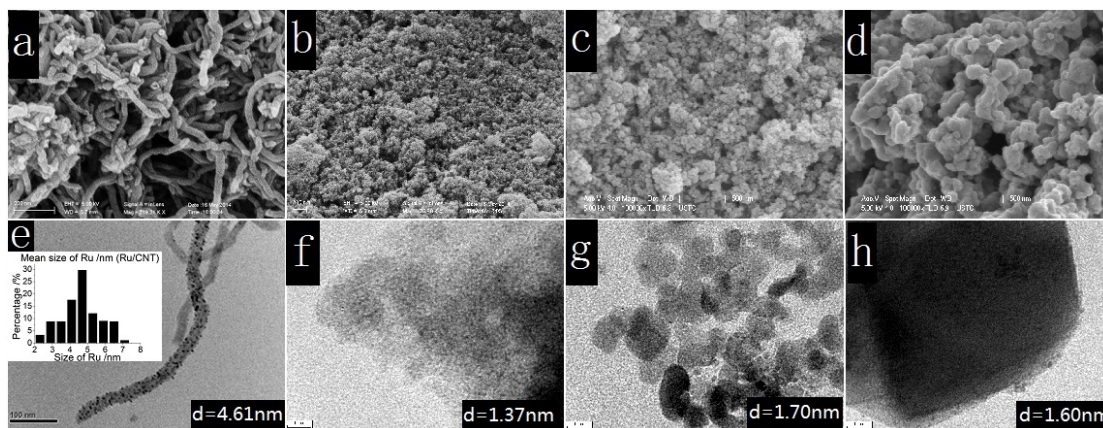

Figure S14. SEM and TEM micrographs of 5%Ru/CNT, 5%Ru/C, 5%Ru/ZrO<sub>2</sub> and 5%Ru/CeO<sub>2</sub>

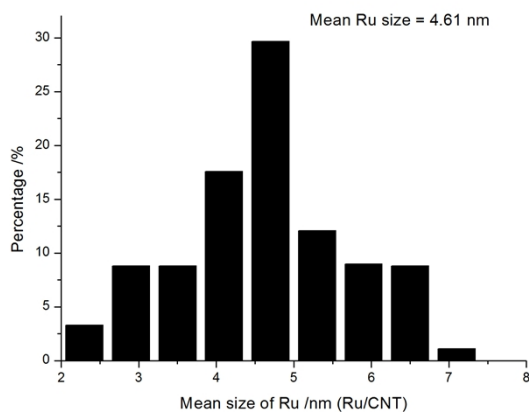

Figure S15. Ru particle size distribution for Ru/CNT

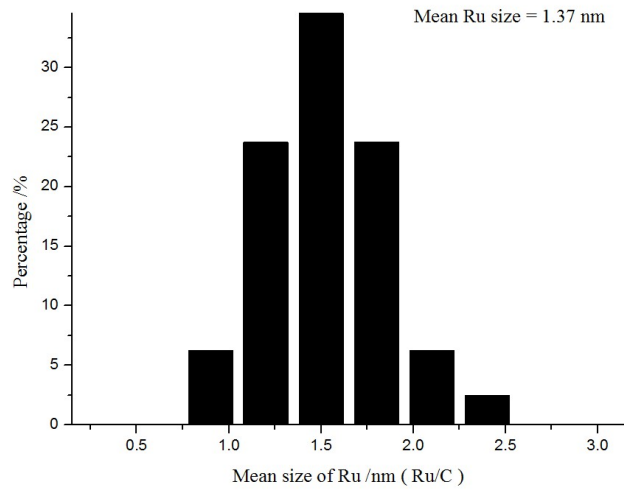

**Figure S16.** Ru particle size distribution for Ru/C

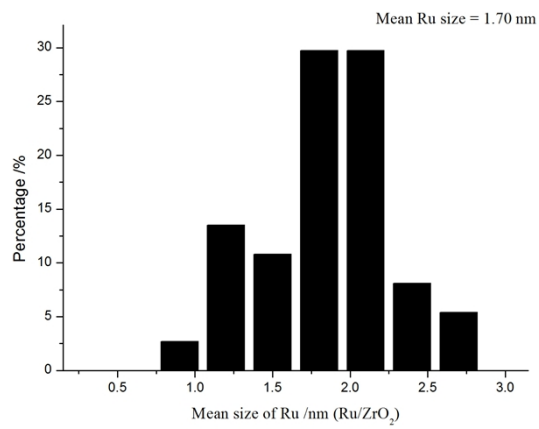

**Figure S17.** Ru particle size distribution for Ru/ZrO<sub>2</sub>

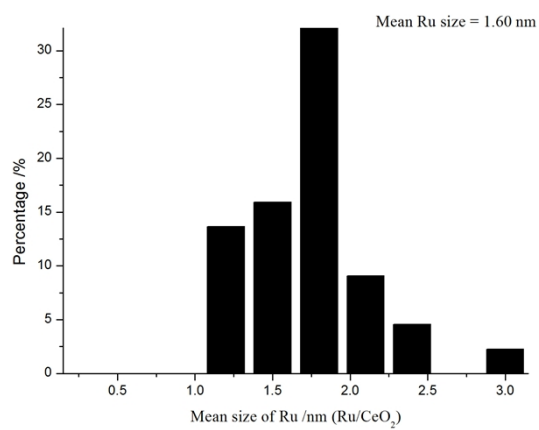

**Figure S18.** Ru particle size distribution for Ru/CeO<sub>2</sub>



### 3. Discussion

#### Catalyst characterization

Table S1 summarizes the metal dispersion and metallic surface area achieved from the chemisorption of Ru/CNT, Ru/C, Ru/ZrO<sub>2</sub> and Ru/CeO<sub>2</sub>.

The CO adsorption curves for Ru/CNT, Ru/C, Ru/ZrO<sub>2</sub> and Ru/CeO<sub>2</sub> are shown in Figure. S1-S4. It can be confirmed from these figures that Ru/C showed a better adsorbing capacity than the others. The adsorbing capacity of Ru/CNT was similar to that of Ru/ZrO<sub>2</sub>, while Ru/CeO<sub>2</sub> showed the least adsorption performance.

Table S2 shows the BET surface area ( $S_{\text{BET}}$ ), pore volume ( $V_p$ ) and pore size ( $D_p$ ) of Ru/CNT, Ru/C, Ru/ZrO<sub>2</sub> and Ru/CeO<sub>2</sub>.

The BJH pore size distributions for Ru/CNT, Ru/C, Ru/ZrO<sub>2</sub> and Ru/CeO<sub>2</sub> are shown in Figure. S4-S7. All these four supported-Ru catalysts shows characteristic of mesoporous materials. However, the N<sub>2</sub> adsorption and desorption curves of Ru/C (not shown here) indicates the presence of partial micropores which are not dominating in Ru/C. Ru/C shows the maximum surface area which is 1245 m<sup>2</sup>/g, in the cases of Ru/CNT, Ru/ZrO<sub>2</sub> and Ru/CeO<sub>2</sub>, 202 m<sup>2</sup>/g, 99 m<sup>2</sup>/g and 5 m<sup>2</sup>/g are achieved, respectively.

The XPS Ru 3p analysis for supported-Ru catalysts and used Ru/CNT in Table S3 and Figures. S9-S13 indicates the presence of Ru<sup>0</sup>, Ru (IV) and Ru (IV)(hydrate) simultaneously, and the ratio of Ru<sup>0</sup> / (Ru (IV)+ Ru (IV)(hydrate)) are calculated through the peak area in Table S3. The ratio showed a higher content of Ru<sup>0</sup> than Ru (IV) and Ru (IV)(hydrate) existed in all the supported-Ru catalysts. The XPS analysis of the used catalysts showed that Ru (IV) and Ru (IV)(hydrate) particles were further reduced into Ru<sup>0</sup> particles under the reductive reaction condition.

Figure. S14 shows the scanning electron microscopy (SEM) microphotographs and transmission electron microscopy (TEM) microphotographs of Ru/CNT, Ru/C, Ru/ZrO<sub>2</sub> and Ru/CeO<sub>2</sub>. The SEM and TEM microphotographs indicates that the Ru particles were dispersed on all the supports homogeneously. And the Ru particle size distribution for all the supported-Ru catalysts (Figure. S15-S18) were calculated from the TEM microphotographs (Figure. S14).

#### The HDO of phenols extracted from bio-oil.

The crude bio-oil was obtained by flash pyrolysis of rice husk at 550-600°C according to the previous work [1]. Phenols were separated from the crude bio-oil by a modified glycerol-assisted distillation technology [1]: a mixture of 10 g glycerin and 100 g bio-oil was distilled. The first distillate under 120°C was about 60 g. The second distillate (about 10 g), mainly consisted of phenols was obtained under 0.1 atm at 120°C. The mixture of the second distillate was washed by NaHCO<sub>3</sub> and the organic layer was extracted by hexane. The hexane was removed by a rotary evaporation. And the mixture of phenols for the hydrodeoxygenation reaction was collected as a light yellow liquid.

The reaction conditions for the HDO of the bio-oil was as follow: bio-oil 200 mg, 5 wt% Ru/CNT 50 mg, n-C<sub>12</sub>H<sub>26</sub>/H<sub>2</sub>O= 6/6 ml, 5.0 MPa H<sub>2</sub>, 270°C, 20 h. The products after the reaction were extracted by ethyl acetate and analyzed by GC and GC-MS (Figure. 4). All the phenols

were converted into alkanes in the biphasic systems.

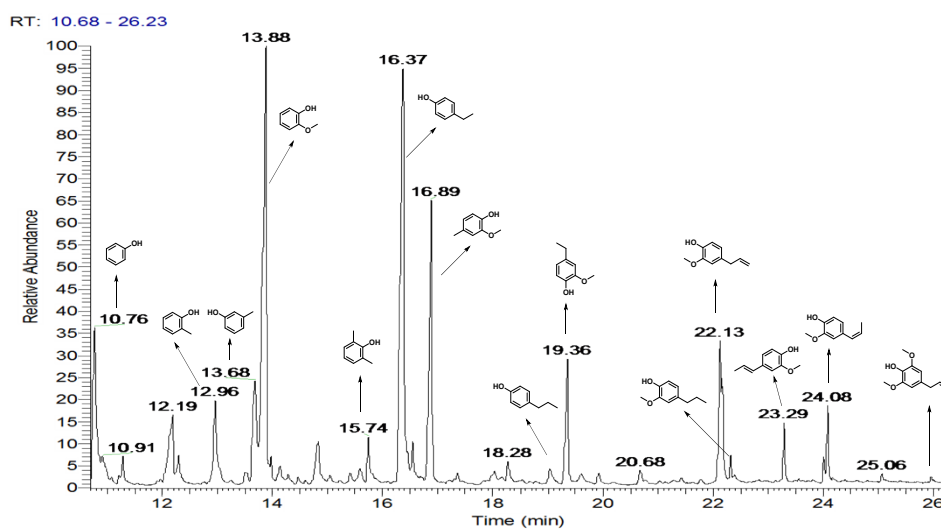

**Figure. S19** GC-MS analysis of the mixture of phenols from bio-oil

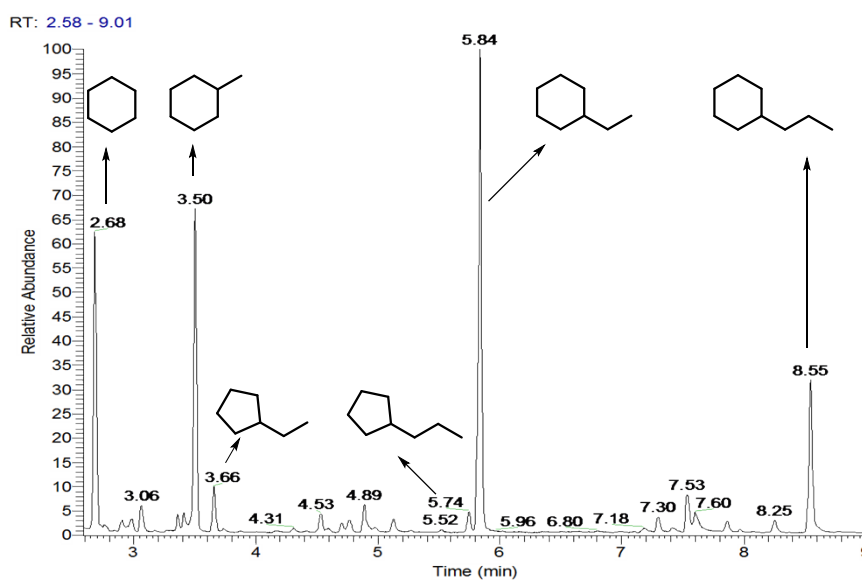

**Figure. S20** GC-MS analysis of the mixture of the alkanes products after the hydrodeoxygenation of bio-oil

**Table S4.** The weight of alkane products from the HDO of bio-oil. (Extracted phenols 200mg)

| Entry | Alkane                | Retention Time/<br>min | Weight/ mg |
|-------|-----------------------|------------------------|------------|
| 1     | <chem>C1CCCCC1</chem> | 2.68                   | 13.47      |

|       |                                                                                   |      |       |
|-------|-----------------------------------------------------------------------------------|------|-------|
| 2     |  | 3.50 | 9.28  |
| 3     |  | 3.66 | 1.43  |
| 4     |  | 4.53 | 0.88  |
| 5     |  | 4.70 | 0.72  |
| 6     |  | 5.74 | 0.78  |
| 7     |  | 5.84 | 15.56 |
| 8     |  | 7.30 | 0.66  |
| 9     |  | 8.25 | 0.62  |
| 10    |  | 8.55 | 5.74  |
| Total |                                                                                   | -    | 49.14 |

[1] J. Guo; R. Ruan, Y. Zhang, *Ind. Eng. Chem. Res.* **2012**, *51*, 6599.
